# Supplementary material for: Contamination Status of Pet Cats in Thailand with Organohalogen Compounds (OHCs) and Their Hydroxylated and Methoxylated Derivatives and Estimation of Sources of Exposure to These Contaminants
Source: MDPI journal article supplement (doi:10.3390/ani12243520), 2022-12-13
Supplement: s1 [file s1]

## Supplementary materials

# Contamination status of pet cats in Thailand with organohalogen compounds (OHCs) and their hydroxylated and methoxylated derivatives and estimation of sources of exposure to these contaminants

Makoto Shimasaki<sup>1</sup>, Hazuki Mizukawa<sup>1,2</sup>, Kohki Takaguchi<sup>3</sup>, Aksorn Saengtienchai<sup>4</sup>, Araya Ngamchirttakul<sup>5</sup>, Disdanai Pencharee<sup>6</sup>, Kraisiri Khidkhan<sup>4,7</sup>, Yoshinori Ikenaka<sup>7,8,9</sup>, Shouta M.M. Nakayama<sup>7</sup>, Mayumi Ishizuka<sup>7</sup>, and Kei Nomiya<sup>1,\*</sup>

<sup>1</sup> Center for Marine Environmental Studies (CMES), Ehime University, Bunkyo-cho 2-5, Matsuyama, Ehime 790-8577, Japan

<sup>2</sup> Department of Science and Technology for Biological Resources and Environment, Graduate School of Agriculture, Ehime University, Tarumi 3-5-7, Matsuyama, Ehime, 790-8566 Japan

<sup>3</sup> Center for Preventive Medical Sciences, Chiba University, 6-2-1 Kashiwanoha, Kashiwa, Chiba 277-0882, Japan

<sup>4</sup> Department of Pharmacology, Faculty of Veterinary Medicine, Kasetsart University, 50 Ngam Wong Wan Rd, Lat Yao, Chatuchak, Bangkok 10900, Thailand

<sup>5</sup> Kasetsart University Veterinary Teaching Hospital Nong Pho, Faculty of Veterinary Medicine, Kasetsart University, Ratchaburi, Thailand.

<sup>6</sup> Kasetsart University Veterinary Teaching Hospital Hua Hin, Faculty of Veterinary Medicine, Kasetsart University, Prachuap Khiri Khan, Thailand.

<sup>7</sup> Department of Environmental Veterinary Sciences, Faculty of Veterinary Medicine, Hokkaido University, Kita 18, Nishi 9, Kita-ku, Sapporo, Hokkaido 060-0818, Japan

<sup>8</sup> Veterinary Teaching Hospital, Graduate School of Veterinary Medicine, Hokkaido University, N18 W9, Sapporo, Hokkaido 060-0818, Japan

<sup>9</sup> One Health Research Center, Hokkaido University, Kita 18, Nishi 9, Kita-ku, Sapporo 060-0818, Japa

\* Correspondence: [nomiya.kei.mb@ehime-u.ac.jp](mailto:nomiya.kei.mb@ehime-u.ac.jp); Tel.: +81-(089)-927-8196

\*Corresponding author: Kei Nomiya, Ph.D.

E-mail: [nomiya.kei.mb@ehime-u.ac.jp](mailto:nomiya.kei.mb@ehime-u.ac.jp)

- **Table S1.** Results on questionnaire for house dust sampling. **P3.**
- **Table S2.** Concentrations of PBDEs in cat sera [pg/mL], dry and wet cat food [pg/g wet wt.] and house dust [pg g<sup>-1</sup> dry wt.]. **P4.**
- **Table S3.** Concentrations of PCBs in cat sera [pg/mL], dry and wet cat food [pg/g wet wt.] and house dust [pg g<sup>-1</sup> dry wt.]. **P5-6.**
- **Table S4.** Concentrations of OH-PCBs in cat sera [pg/mL], dry and wet cat food [pg/g wet wt.] and house dust [pg g<sup>-1</sup> dry wt.]. **P7-8.**
- **Table S5.** Concentrations of OH-PBDEs in cat sera [pg/mL], dry and wet cat food [pg/g wet wt.] and house dust [pg g<sup>-1</sup> dry wt.]. **P9.**
- **Table S6.** Concentrations of MeO-PBDEs in cat sera [pg/mL], dry and wet cat food [pg/g wet wt.] and house dust [pg g<sup>-1</sup> dry wt.]. **P10.**
- **Table S7.** Lipid-based concentrations (ng g<sup>-1</sup>) of OHCs in cat serum (*n* = 26). **P11.**
- **Table S8.** Correlations between the concentrations [wet wt. base] of OHCs in cat sera and the results of questionnaires. **P12.**
- **Table S9.** Correlations between the concentrations [lipid wt. base] of OHCs in cat sera and the results of questionnaires\*. **P13.**
- **Table S10.** Estimation of daily intake of BDE-47 via cat food and house dust. **P14.**
- **Table. S11.** Estimation of daily intake of BDE-99 via cat food and house dust. **P15.**
- **Table S12.** Estimation of daily intake of BDE-153 via cat food and house dust. **P16.**
- **Table S13.** Estimation of daily intake of BDE-209 via cat food and house dust. **P17.**

**Table S1.** Results on questionnaire for house dust sampling.

| Sample name | Room        | Area/m <sup>2</sup> | Number of cleanings per week* | Electric appliance & Furniture |                  |                       |              |                      |                           |                                |                           |                |                   |               |                   |                 |
|-------------|-------------|---------------------|-------------------------------|--------------------------------|------------------|-----------------------|--------------|----------------------|---------------------------|--------------------------------|---------------------------|----------------|-------------------|---------------|-------------------|-----------------|
|             |             |                     |                               | Flooring                       | Number of window | Ventilation frequency | Number of TV | Number of desktop PC | Number of air conditioner | Other electric appliances      | Other electric appliances | Number of sofa | Number of curtain | Number of Bed | Other furniture   | Other furniture |
| TH-DUST-1   | Living      | 3×3                 | 3                             | Wooden floor                   | 16               | all times             | 1            | -                    | -                         | Fan (3)                        |                           | 2              | -                 | -             |                   | -               |
|             | Dining room | 3×4                 | 3                             | Stone                          | 5                | all times             | -            | -                    | -                         | Pot (1)                        | Rice cooker (1)           | -              | -                 | -             |                   | -               |
|             | Bed room    | 3×3                 | 3                             | Wooden floor                   | 8                | 2 times / day         | -            | -                    | -                         | Radio (1)                      |                           | -              | 2                 | -             |                   | -               |
| TH-DUST-4   | Living      | 10×10               | 2                             | Stone                          | 10               | all times             | 1            | -                    | -                         | Freezer (1)                    | -                         | -              | -                 | -             | Wood table (1)    | Wood chair (6)  |
|             | Dining room | 3×4                 | 3                             | Stone                          | 2                | all times             | -            | -                    | -                         | Microwave oven (1), Cooker (1) | Pot (1)                   | -              | -                 | -             | Wood table (1)    | Wood chair (4)  |
|             | Bed room    | 5×6                 | 1                             | Stone                          | 4                | all times             | 1            | 2                    | 1                         | Fan (2)                        | -                         | -              | -                 | 1             | -                 | -               |
| TH-DUST-5   | Living      | 3×3                 | 2                             | Stone                          | 6                | all times             | 1            | -                    | -                         | -                              | -                         | -              | -                 | 1             | -                 | -               |
|             | Dining room | 2×3                 | 2                             | Stone                          | 4                | all times             | -            | -                    | -                         | Pot (1), Oven (1)              | Freezer (1)               | -              | -                 | -             | Wood table (1)    | Wood chair (2)  |
|             | Bed room    | 3×3                 | 2                             | Wooden floor                   | 8                | all times             | -            | -                    | -                         | -                              | Fan (3)                   | -              | -                 | 1             | -                 | -               |
| TH-DUST-6   | Living      | 10×5                | 1                             | Stone                          | Open             | all times             | 1            | 1                    | -                         | Fan (1)                        | -                         | -              | -                 | -             | Wood table (1)    | Wood chair (5)  |
|             | Dining room | 3×3                 | 1                             | Stone                          | Open             | all times             | -            | -                    | -                         | Pot (1), Freezer (1)           | Cooker (1)                | -              | -                 | -             | Wood table (2)    | Wood chair (8)  |
|             | Bed room    | 3.5×3.5             | 1                             | Wooden floor                   | 8                | all times             | -            | -                    | -                         | Fan (1)                        | -                         | -              | -                 | 1             | -                 | -               |
| TH-DUST-7   | Living      | 6×6                 | 2                             | Wooden floor                   | Open             | all times             | 1            | -                    | -                         | Fan (2)                        | -                         | -              | -                 | -             | Wood table (2)    | Wood chair (10) |
|             | Dining room | 4×4                 | 2                             | Stone                          | 6                | 2                     | -            | -                    | -                         | Cooker (1), Pot (1)            | Oven (1), Freezer (1)     | -              | -                 | -             | Wood table (1)    | Wood chair (5)  |
|             | Bed room    | 3×3                 | 2                             | Wooden floor                   | 4                | 1                     | 1            | -                    | 1                         | Fan (1)                        | -                         | -              | -                 | 1             | -                 | -               |
| TH-DUST-8   | Living      | 2×2                 | 3                             | Stone                          | 3                | 1                     | 1            | -                    | -                         | Fan (1)                        | -                         | 1              | 3                 | -             | Wood table (1)    | -               |
|             | Dining room | 3×3                 | 3                             | Stone                          | 3                | 1                     | -            | -                    | -                         | Pot (1)                        | Cooker (1)                | -              | -                 | -             | Wood table (1)    | -               |
|             | Bed room    | 2×3                 | 1                             | Stone                          | 3                | 1                     | -            | -                    | -                         | Fan (1)                        | -                         | -              | 3                 | 1             | Wood wardrobe (1) | -               |
| TH-DUST-13  | Living      | 3×4                 | 2                             | Wooden floor                   | 2                | 1                     | -            | 1                    | 1                         | -                              | -                         | -              | -                 | -             | Wood table (1)    | Wood chair (1)  |
|             | Dining room | 3×3                 | 2                             | Wooden floor                   | 3                | 1                     | -            | -                    | -                         | Pot (1)                        | -                         | -              | -                 | -             | -                 | -               |
|             | Bed room    | 2×3                 | 2                             | Wooden floor                   | 1                | 1                     | -            | -                    | -                         | Fan (1)                        | -                         | -              | 1                 | 1             | -                 | -               |

**Table S2.** Concentrations of PBDEs in cat sera [pg mL<sup>-1</sup>], dry and wet cat food [pg g<sup>-1</sup> wet wt.] and house dust [pg g<sup>-1</sup> dry wt.].

| PBDEs      | Cat sera |      |        |              |        |     | Dry food |       |        |             |        |     | Wet food |     |        |           |        |     | House dust |        |        |                |        |      |
|------------|----------|------|--------|--------------|--------|-----|----------|-------|--------|-------------|--------|-----|----------|-----|--------|-----------|--------|-----|------------|--------|--------|----------------|--------|------|
|            | Mean     | SD   | Median | Range        | DF [%] | MDL | Mean     | SD    | Median | Range       | DF [%] | MDL | Mean     | SD  | Median | Range     | DF [%] | MDL | Mean       | SD     | Median | Range          | DF [%] | MDL  |
| BDE47      | 4.2      | 11   | <MDL   | <MDL - 70    | 26     | 6.1 | 5.0      | 5.1   | 4.9    | <MDL - 15   | 71     | 2.1 | 11       | 16  | 5.6    | <MDL - 46 | 71     | 2.1 | 320        | 270    | 260    | 110 - 890      | 100    | 110  |
| BDE49      | <MDL     | -    | <MDL   | <MDL         | 0      | 8.0 | 1.1      | 2.9   | <MDL   | <MDL - 7.7  | 14     | 3.3 | <MDL     | -   | <MDL   | <MDL      | 0      | 3.3 | <MDL       | -      | <MDL   | <MDL           | 0      | 110  |
| BDE71      | <MDL     | -    | <MDL   | <MDL         | 0      | 9.7 | <MDL     | -     | <MDL   | <MDL        | 0      | 4.2 | 5.9      | 16  | <MDL   | <MDL - 41 | 14     | 4.2 | <MDL       | -      | <MDL   | <MDL           | 0      | 200  |
| BDE66      | <MDL     | -    | <MDL   | <MDL         | 0      | 13  | <MDL     | -     | <MDL   | <MDL        | 0      | 6.8 | <MDL     | -   | <MDL   | <MDL      | 0      | 6.8 | <MDL       | -      | <MDL   | <MDL           | 0      | 130  |
| BDE77      | <MDL     | -    | <MDL   | <MDL         | 0      | 13  | <MDL     | -     | <MDL   | <MDL        | 0      | 3.9 | <MDL     | -   | <MDL   | <MDL      | 0      | 3.9 | <MDL       | -      | <MDL   | <MDL           | 0      | 290  |
| BDE100     | 0.25     | 1.6  | <MDL   | <MDL - 10    | 2.6    | 8.6 | 1.1      | 1.8   | <MDL   | <MDL - 3.9  | 29     | 3.1 | 4.7      | 9.1 | <MDL   | <MDL - 25 | 43     | 3.1 | 41         | 110    | <MDL   | <MDL - 290     | 14     | 150  |
| BDE99      | 5.4      | 16   | <MDL   | <MDL - 95    | 21     | 11  | 2.8      | 4.9   | <MDL   | <MDL - 12   | 29     | 4.4 | 1.6      | 4.3 | <MDL   | <MDL - 11 | 14     | 4.4 | 410        | 450    | 210    | 130 - 1400     | 100    | 120  |
| BDE119     | <MDL     | -    | <MDL   | <MDL         | 0      | 17  | <MDL     | -     | <MDL   | <MDL        | 0      | 2.6 | <MDL     | -   | <MDL   | <MDL      | 0      | 2.6 | <MDL       | -      | <MDL   | <MDL           | 0      | 200  |
| BDE85      | <MDL     | -    | <MDL   | <MDL         | 0      | 16  | <MDL     | -     | <MDL   | <MDL        | 0      | 5.0 | <MDL     | -   | <MDL   | <MDL      | 0      | 5.0 | <MDL       | -      | <MDL   | <MDL           | 0      | 100  |
| BDE126     | <MDL     | -    | <MDL   | <MDL         | 0      | 18  | <MDL     | -     | <MDL   | <MDL        | 0      | 6.5 | <MDL     | -   | <MDL   | <MDL      | 0      | 6.5 | <MDL       | -      | <MDL   | <MDL           | 0      | 200  |
| BDE154     | 0.53     | 3.4  | <MDL   | <MDL - 22    | 2.6    | 17  | <MDL     | -     | <MDL   | <MDL        | 0      | 4.6 | <MDL     | -   | <MDL   | <MDL      | 0      | 4.6 | <MDL       | -      | <MDL   | <MDL           | 0      | 150  |
| BDE153     | 3.9      | 18   | <MDL   | <MDL - 110   | 5.1    | 16  | <MDL     | -     | <MDL   | <MDL        | 0      | 2.4 | <MDL     | -   | <MDL   | <MDL      | 0      | 2.4 | 62         | 160    | <MDL   | <MDL - 430     | 14     | 390  |
| BDE139     | <MDL     | -    | <MDL   | <MDL         | 0      | 17  | <MDL     | -     | <MDL   | <MDL        | 0      | 7.5 | <MDL     | -   | <MDL   | <MDL      | 0      | 7.5 | <MDL       | -      | <MDL   | <MDL           | 0      | 290  |
| BDE140     | <MDL     | -    | <MDL   | <MDL         | 0      | 23  | <MDL     | -     | <MDL   | <MDL        | 0      | 4.2 | <MDL     | -   | <MDL   | <MDL      | 0      | 4.2 | <MDL       | -      | <MDL   | <MDL           | 0      | 220  |
| BDE138     | <MDL     | -    | <MDL   | <MDL         | 0      | 43  | <MDL     | -     | <MDL   | <MDL        | 0      | 15  | <MDL     | -   | <MDL   | <MDL      | 0      | 15  | <MDL       | -      | <MDL   | <MDL           | 0      | 690  |
| BDE169     | <MDL     | -    | <MDL   | <MDL         | 0      | 43  | <MDL     | -     | <MDL   | <MDL        | 0      | 4.4 | <MDL     | -   | <MDL   | <MDL      | 0      | 4.4 | <MDL       | -      | <MDL   | <MDL           | 0      | 690  |
| BDE183     | 11       | 61   | <MDL   | <MDL - 390   | 5.1    | 18  | 9.0      | 9.7   | 12     | <MDL - 26   | 57     | 8.9 | <MDL     | -   | <MDL   | <MDL      | 0      | 8.9 | 480        | 490    | 640    | <MDL - 1300    | 57     | 170  |
| BDE184     | <MDL     | -    | <MDL   | <MDL         | 0      | 18  | <MDL     | -     | <MDL   | <MDL        | 0      | 6.8 | <MDL     | -   | <MDL   | <MDL      | 0      | 6.8 | <MDL       | -      | <MDL   | <MDL           | 0      | 530  |
| BDE180     | <MDL     | -    | <MDL   | <MDL         | 0      | 39  | <MDL     | -     | <MDL   | <MDL        | 0      | 11  | <MDL     | -   | <MDL   | <MDL      | 0      | 11  | <MDL       | -      | <MDL   | <MDL           | 0      | 550  |
| BDE171     | <MDL     | -    | <MDL   | <MDL         | 0      | 19  | <MDL     | -     | <MDL   | <MDL        | 0      | 5.2 | <MDL     | -   | <MDL   | <MDL      | 0      | 5.2 | <MDL       | -      | <MDL   | <MDL           | 0      | 820  |
| BDE191     | <MDL     | -    | <MDL   | <MDL         | 0      | 30  | <MDL     | -     | <MDL   | <MDL        | 0      | 22  | <MDL     | -   | <MDL   | <MDL      | 0      | 22  | <MDL       | -      | <MDL   | <MDL           | 0      | 670  |
| BDE197+204 | 11       | 27   | <MDL   | <MDL - 130   | 31     | 8.4 | 9.6      | 21    | <MDL   | <MDL - 57   | 29     | 5.2 | <MDL     | -   | <MDL   | <MDL      | 0      | 5.2 | 290        | 240    | 350    | <MDL - 650     | 71     | 86   |
| BDE196     | 9.2      | 31   | <MDL   | <MDL - 170   | 13     | 26  | 19       | 50    | <MDL   | <MDL - 130  | 14     | 17  | <MDL     | -   | <MDL   | <MDL      | 0      | 17  | 710        | 590    | 890    | <MDL - 1400    | 71     | 270  |
| BDE201     | 17       | 38   | <MDL   | <MDL - 150   | 46     | 8.7 | 11       | 28    | <MDL   | <MDL - 75   | 14     | 13  | <MDL     | -   | <MDL   | <MDL      | 0      | 13  | 300        | 420    | <MDL   | <MDL - 1100    | 43     | 430  |
| BDE203     | 12       | 48   | <MDL   | <MDL - 270   | 10     | 23  | 34       | 89    | <MDL   | <MDL - 240  | 14     | 18  | <MDL     | -   | <MDL   | <MDL      | 0      | 18  | 930        | 980    | 1000   | <MDL - 2500    | 57     | 610  |
| BDE205     | 0.82     | 5.2  | <MDL   | <MDL - 33    | 2.6    | 29  | <MDL     | -     | <MDL   | <MDL        | 0      | 6.7 | <MDL     | -   | <MDL   | <MDL      | 0      | 6.7 | <MDL       | -      | <MDL   | <MDL           | 0      | 460  |
| BDE206     | 90       | 370  | <MDL   | <MDL - 2000  | 13     | 66  | 200      | 530   | <MDL   | <MDL - 1400 | 14     | 25  | <MDL     | -   | <MDL   | <MDL      | 0      | 25  | 15000      | 14000  | 14000  | <MDL - 40000   | 86     | 2000 |
| BDE207     | 250      | 810  | 74     | <MDL - 4500  | 79     | 36  | 250      | 650   | <MDL   | <MDL - 1700 | 14     | 30  | <MDL     | -   | <MDL   | <MDL      | 0      | 30  | 11000      | 7000   | 10000  | 2000 - 22000   | 100    | 680  |
| BDE208     | 180      | 630  | <MDL   | <MDL - 3900  | 44     | 47  | 160      | 430   | <MDL   | <MDL - 1100 | 14     | 24  | <MDL     | -   | <MDL   | <MDL      | 0      | 24  | 5400       | 3900   | 6600   | <MDL - 11000   | 86     | 1600 |
| BDE209     | 1900     | 6800 | 350    | <MDL - 37000 | 79     | 67  | 4700     | 12000 | 330    | 180 - 31000 | 100    | 15  | 19       | 33  | <MDL   | <MDL - 69 | 29     | 15  | 240000     | 200000 | 200000 | 21000 - 520000 | 100    | 5600 |

|               |      |      |     |                 |     |      |       |     |                |     |    |    |    |               |    |        |        |        |                   |     |
|---------------|------|------|-----|-----------------|-----|------|-------|-----|----------------|-----|----|----|----|---------------|----|--------|--------|--------|-------------------|-----|
| <b>ΣPBDEs</b> | 2500 | 8600 | 490 | <MDL -<br>48000 | 100 | 5400 | 13000 | 350 | 200 -<br>36000 | 100 | 42 | 70 | 12 | <MDL -<br>190 | 71 | 270000 | 230000 | 240000 | 26000 -<br>590000 | 100 |
|---------------|------|------|-----|-----------------|-----|------|-------|-----|----------------|-----|----|----|----|---------------|----|--------|--------|--------|-------------------|-----|

**Table S3.** Concentrations of PCBs in cat sera [pg mL<sup>-1</sup>], dry and wet cat food [pg g<sup>-1</sup> wet wt.] and house dust [pg g<sup>-1</sup> dry wt.].

| PCBs   | Cat sera |     |        |            |        |     | Dry food |     |        |            |        |     | Wet food |     |        |            |        |     | House dust |     |        |            |        |     |
|--------|----------|-----|--------|------------|--------|-----|----------|-----|--------|------------|--------|-----|----------|-----|--------|------------|--------|-----|------------|-----|--------|------------|--------|-----|
|        | Mean     | SD  | Median | Range      | DF (%) | MDL | Mean     | SD  | Median | Range      | DF (%) | MDL | Mean     | SD  | Median | Range      | DF (%) | MDL | Mean       | SD  | Median | Range      | DF (%) | MDL |
| CB-19  | <MDL     | -   | <MDL   | <MDL       | 0      | 9.0 | <MDL     | -   | <MDL   | <MDL       | 0      | 4.1 | <MDL     | -   | <MDL   | <MDL       | 0      | 4.1 | <MDL       | -   | <MDL   | <MDL       | 0      | 440 |
| CB-18  | <MDL     | -   | <MDL   | <MDL       | 0      | 13  | 2.5      | 6.5 | <MDL   | <MDL - 17  | 14     | 6.1 | 4.8      | 13  | <MDL   | <MDL - 33  | 14     | 6.1 | <MDL       | -   | <MDL   | <MDL       | 0      | 300 |
| CB-28  | 1.2      | 3.9 | <MDL   | <MDL - 17  | 10     | 9.2 | 19       | 21  | 14     | <MDL - 56  | 57     | 8.3 | 7.6      | 20  | <MDL   | <MDL - 53  | 14     | 8.3 | <MDL       | -   | <MDL   | <MDL       | 0      | 320 |
| CB-33  | <MDL     | -   | <MDL   | <MDL       | 0      | 9.4 | 4.5      | 8.0 | <MDL   | <MDL - 20  | 29     | 3.4 | 2.4      | 6.5 | <MDL   | <MDL - 17  | 14     | 3.4 | <MDL       | -   | <MDL   | <MDL       | 0      | 170 |
| CB-22  | <MDL     | -   | <MDL   | <MDL       | 0      | 8.7 | <MDL     | -   | <MDL   | <MDL       | 0      | 5.3 | <MDL     | -   | <MDL   | <MDL       | 0      | 5.3 | <MDL       | -   | <MDL   | <MDL       | 0      | 190 |
| CB-37  | <MDL     | -   | <MDL   | <MDL       | 0      | 13  | <MDL     | -   | <MDL   | <MDL       | 0      | 9.3 | <MDL     | -   | <MDL   | <MDL       | 0      | 9.3 | <MDL       | -   | <MDL   | <MDL       | 0      | 290 |
| CB-54  | <MDL     | -   | <MDL   | <MDL       | 0      | 7.1 | <MDL     | -   | <MDL   | <MDL       | 0      | 4.4 | <MDL     | -   | <MDL   | <MDL       | 0      | 4.4 | <MDL       | -   | <MDL   | <MDL       | 0      | 250 |
| CB-52  | 0.57     | 2.6 | <MDL   | <MDL - 12  | 5.1    | 9.5 | <MDL     | -   | <MDL   | <MDL       | 0      | 7.9 | 7.3      | 19  | <MDL   | <MDL - 51  | 14     | 7.9 | 29         | 76  | <MDL   | <MDL - 200 | 14     | 170 |
| CB-49  | <MDL     | -   | <MDL   | <MDL       | 0      | 12  | <MDL     | -   | <MDL   | <MDL       | 0      | 8.8 | 3.6      | 10  | <MDL   | <MDL - 25  | 14     | 8.8 | <MDL       | -   | <MDL   | <MDL       | 0      | 140 |
| CB-44  | <MDL     | -   | <MDL   | <MDL       | 0      | 9.7 | <MDL     | -   | <MDL   | <MDL       | 0      | 5.4 | <MDL     | -   | <MDL   | <MDL       | 0      | 5.4 | <MDL       | -   | <MDL   | <MDL       | 0      | 210 |
| CB-74  | 0.28     | 1.8 | <MDL   | <MDL - 11  | 2.6    | 7.4 | 1.5      | 4.0 | <MDL   | <MDL - 11  | 14     | 6.4 | 4.2      | 11  | <MDL   | <MDL - 29  | 14     | 6.4 | <MDL       | -   | <MDL   | <MDL       | 0      | 150 |
| CB-70  | 0.24     | 1.6 | <MDL   | <MDL - 10  | 2.6    | 4.6 | 1.6      | 4.1 | <MDL   | <MDL - 11  | 14     | 6.0 | 7.4      | 20  | <MDL   | <MDL - 52  | 14     | 6.0 | <MDL       | -   | <MDL   | <MDL       | 0      | 330 |
| CB-81  | <MDL     | -   | <MDL   | <MDL       | 0      | 4.5 | <MDL     | -   | <MDL   | <MDL       | 0      | 4.2 | <MDL     | -   | <MDL   | <MDL       | 0      | 4.2 | <MDL       | -   | <MDL   | <MDL       | 0      | 220 |
| CB-77  | <MDL     | -   | <MDL   | <MDL       | 0      | 5.9 | <MDL     | -   | <MDL   | <MDL       | 0      | 3.8 | <MDL     | -   | <MDL   | <MDL       | 0      | 3.8 | <MDL       | -   | <MDL   | <MDL       | 0      | 230 |
| CB-104 | <MDL     | -   | <MDL   | <MDL       | 0      | 4.3 | <MDL     | -   | <MDL   | <MDL       | 0      | 4.4 | <MDL     | -   | <MDL   | <MDL       | 0      | 4.4 | <MDL       | -   | <MDL   | <MDL       | 0      | 47  |
| CB-95  | <MDL     | -   | <MDL   | <MDL       | 0      | 5.7 | 1.3      | 3.4 | <MDL   | <MDL - 9.1 | 14     | 4.1 | 9.5      | 25  | <MDL   | <MDL - 67  | 14     | 4.1 | <MDL       | -   | <MDL   | <MDL       | 0      | 140 |
| CB-101 | 2.2      | 9.8 | <MDL   | <MDL - 61  | 10     | 2.1 | 5.8      | 5.7 | 6.8    | <MDL - 12  | 57     | 4.2 | 25       | 56  | <MDL   | <MDL - 150 | 29     | 4.2 | 86         | 230 | <MDL   | <MDL - 600 | 14     | 170 |
| CB-99  | 2.0      | 10  | <MDL   | <MDL - 65  | 7.7    | 5.4 | 4.8      | 4.8 | 6.2    | <MDL - 11  | 57     | 4.1 | 16.0     | 31  | <MDL   | <MDL - 79  | 43     | 4.1 | <MDL       | -   | <MDL   | <MDL       | 0      | 92  |
| CB-119 | 0.16     | 1.0 | <MDL   | <MDL - 6.5 | 2.6    | 2.6 | <MDL     | -   | <MDL   | <MDL       | 0      | 5.0 | <MDL     | -   | <MDL   | <MDL       | 0      | 5.0 | <MDL       | -   | <MDL   | <MDL       | 0      | 54  |
| CB-87  | <MDL     | -   | <MDL   | <MDL       | 0      | 4.3 | <MDL     | -   | <MDL   | <MDL       | 0      | 3.0 | 7.2      | 19  | <MDL   | <MDL - 50  | 14     | 3.0 | <MDL       | -   | <MDL   | <MDL       | 0      | 76  |
| CB-110 | 0.24     | 1.1 | <MDL   | <MDL - 5.5 | 5.1    | 3.4 | 2.4      | 3.1 | <MDL   | <MDL - 7.2 | 43     | 2.2 | 11       | 23  | <MDL   | <MDL - 62  | 43     | 2.2 | <MDL       | -   | <MDL   | <MDL       | 0      | 100 |
| CB-123 | <MDL     | -   | <MDL   | <MDL       | 0      | 6.2 | <MDL     | -   | <MDL   | <MDL       | 0      | 6.4 | 3.6      | 10  | <MDL   | <MDL - 25  | 14     | 6.4 | <MDL       | -   | <MDL   | <MDL       | 0      | 110 |
| CB-118 | 1.8      | 9.7 | <MDL   | <MDL - 61  | 5.1    | 7.8 | 8.8      | 5.4 | 8.4    | <MDL - 18  | 86     | 6.8 | 24       | 56  | <MDL   | <MDL - 150 | 43     | 6.8 | <MDL       | -   | <MDL   | <MDL       | 0      | 46  |
| CB-114 | <MDL     | -   | <MDL   | <MDL       | 0      | 9.5 | <MDL     | -   | <MDL   | <MDL       | 0      | 4.0 | <MDL     | -   | <MDL   | <MDL       | 0      | 4.0 | <MDL       | -   | <MDL   | <MDL       | 0      | 180 |
| CB-105 | 0.31     | 2.0 | <MDL   | <MDL - 13  | 2.6    | 4.3 | 0.72     | 1.9 | <MDL   | <MDL - 5.0 | 29     | 4.8 | 6.1      | 16  | <MDL   | <MDL - 43  | 14     | 4.8 | <MDL       | -   | <MDL   | <MDL       | 0      | 100 |
| CB-126 | <MDL     | -   | <MDL   | <MDL       | 0      | 5.5 | <MDL     | -   | <MDL   | <MDL       | 0      | 4.0 | <MDL     | -   | <MDL   | <MDL       | 0      | 4.0 | <MDL       | -   | <MDL   | <MDL       | 0      | 89  |
| CB-155 | 0.44     | 2.8 | <MDL   | <MDL - 18  | 2.6    | 3.8 | <MDL     | -   | <MDL   | <MDL       | 0      | 3.6 | 1.7      | 4.4 | <MDL   | <MDL - 12  | 14     | 3.6 | <MDL       | -   | <MDL   | <MDL       | 0      | 110 |
| CB-151 | 0.76     | 4.9 | <MDL   | <MDL - 31  | 2.6    | 6.1 | <MDL     | -   | <MDL   | <MDL       | 0      | 4.3 | 8.3      | 22  | <MDL   | <MDL - 58  | 14     | 4.3 | <MDL       | -   | <MDL   | <MDL       | 0      | 160 |
| CB-149 | 2.3      | 9.8 | <MDL   | <MDL - 61  | 10     | 3.0 | <MDL     | -   | <MDL   | <MDL       | 0      | 2.1 | 30       | 61  | <MDL   | <MDL - 160 | 29     | 2.1 | <MDL       | -   | <MDL   | <MDL       | 0      | 170 |
| CB-153 | 19       | 53  | 8.0    | <MDL - 340 | 51     | 5.7 | 26       | 7.8 | 24     | 20 - 43    | 100    | 5.6 | 78       | 120 | 12     | <MDL - 310 | 71     | 5.6 | <MDL       | -   | <MDL   | <MDL       | 0      | 170 |
| CB-168 | <MDL     | -   | <MDL   | <MDL       | 0      | 3.9 | <MDL     | -   | <MDL   | <MDL       | 0      | 3.4 | <MDL     | -   | <MDL   | <MDL       | 0      | 3.4 | <MDL       | -   | <MDL   | <MDL       | 0      | 96  |
| CB-138 | 14       | 39  | 3.7    | <MDL - 250 | 49     | 3.5 | 20       | 5.7 | 19     | 15 - 32    | 100    | 3.5 | 52       | 87  | 9.1    | <MDL - 240 | 71     | 3.5 | <MDL       | -   | <MDL   | <MDL       | 0      | 130 |
| CB-158 | 0.35     | 2.3 | <MDL   | <MDL - 15  | 2.6    | 5.0 | <MDL     | -   | <MDL   | <MDL       | 0      | 3.0 | 2.0      | 5.3 | <MDL   | <MDL - 14  | 14     | 3.0 | <MDL       | -   | <MDL   | <MDL       | 0      | 110 |
| CB-128 | 0.68     | 4.4 | <MDL   | <MDL - 28  | 2.6    | 4.3 | <MDL     | -   | <MDL   | <MDL       | 0      | 10  | 8.5      | 23  | <MDL   | <MDL - 60  | 14     | 10  | <MDL       | -   | <MDL   | <MDL       | 0      | 120 |

**Table S3.** Concentrations of PCBs in cat sera [pg mL<sup>-1</sup>], dry and wet cat food [pg g<sup>-1</sup> wet wt.] and house dust [pg g<sup>-1</sup> dry wt.] (Continued)

|        | Cat sera |      |        |             |        |     | Dry food |     |        |            |        |     | Wet food |     |        |             |        |     | House dust |     |        |            |        |     |
|--------|----------|------|--------|-------------|--------|-----|----------|-----|--------|------------|--------|-----|----------|-----|--------|-------------|--------|-----|------------|-----|--------|------------|--------|-----|
| PCBs   | Mean     | SD   | Median | Range       | DF (%) | MDL | Mean     | SD  | Median | Range      | DF (%) | MDL | Mean     | SD  | Median | Range       | DF (%) | MDL | Mean       | SD  | Median | Range      | DF (%) | MDL |
| CB-167 | 0.20     | 1.2  | <MDL   | <MDL - 8.0  | 2.6    | 4.5 | <MDL     | -   | <MDL   | <MDL       | 0      | 6.6 | 3.4      | 9.1 | <MDL   | <MDL - 24   | 14     | 6.6 | <MDL       | -   | <MDL   | <MDL       | 0      | 200 |
| CB-156 | 0.39     | 2.5  | <MDL   | <MDL - 16   | 2.6    | 4.6 | <MDL     | -   | <MDL   | <MDL       | 14     | 3.5 | 2.0      | 5.4 | <MDL   | <MDL - 14   | 14     | 3.5 | <MDL       | -   | <MDL   | <MDL       | 0      | 150 |
| CB-157 | 0.17     | 1.1  | <MDL   | <MDL - 7.0  | 2.6    | 4.6 | <MDL     | -   | <MDL   | <MDL       | 0      | 5.9 | <MDL     | -   | <MDL   | <MDL        | 0      | 5.9 | <MDL       | -   | <MDL   | <MDL       | 0      | 140 |
| CB-169 | <MDL     | -    | <MDL   | <MDL        | 0      | 4.6 | <MDL     | -   | <MDL   | <MDL       | 0      | 3.4 | <MDL     | -   | <MDL   | <MDL        | 0      | 3.4 | <MDL       | -   | <MDL   | <MDL       | 0      | 240 |
| CB-188 | <MDL     | -    | <MDL   | <MDL        | 0      | 4.4 | <MDL     | -   | <MDL   | <MDL       | 0      | 5.4 | <MDL     | -   | <MDL   | <MDL        | 0      | 5.4 | <MDL       | -   | <MDL   | <MDL       | 0      | 76  |
| CB-178 | 0.58     | 3.7  | <MDL   | <MDL - 24   | 2.6    | 5.2 | <MDL     | -   | <MDL   | <MDL       | 0      | 5.3 | 2.3      | 6.1 | <MDL   | <MDL - 16   | 14     | 5.3 | <MDL       | -   | <MDL   | <MDL       | 0      | 120 |
| CB-187 | 2.5      | 16   | <MDL   | <MDL - 100  | 2.6    | 24  | <MDL     | -   | <MDL   | <MDL       | 71     | 11  | 27       | 41  | <MDL   | <MDL - 96   | 57     | 11  | <MDL       | -   | <MDL   | <MDL       | 0      | 110 |
| CB-183 | 1.1      | 6.9  | <MDL   | <MDL - 44   | 2.6    | 18  | <MDL     | -   | <MDL   | <MDL       | 14     | 7.7 | 4.2      | 11  | <MDL   | <MDL - 29   | 14     | 7.7 | <MDL       | -   | <MDL   | <MDL       | 0      | 76  |
| CB-177 | 0.72     | 4.6  | <MDL   | <MDL - 29   | 2.6    | 4.5 | <MDL     | -   | <MDL   | <MDL       | 14     | 3.9 | 3.6      | 9.4 | <MDL   | <MDL - 25   | 14     | 3.9 | <MDL       | -   | <MDL   | <MDL       | 0      | 140 |
| CB-171 | 0.28     | 1.8  | <MDL   | <MDL - 11   | 2.6    | 4.7 | <MDL     | -   | <MDL   | <MDL       | 0      | 4.1 | 1.2      | 3.2 | <MDL   | <MDL - 8.5  | 14     | 4.1 | <MDL       | -   | <MDL   | <MDL       | 0      | 120 |
| CB-180 | 6.4      | 24   | <MDL   | <MDL - 150  | 23     | 2.7 | 13       | 3.3 | 11     | 10 - 20    | 100    | 3.7 | 25       | 31  | 11.0   | <MDL - 81   | 86     | 3.7 | <MDL       | -   | <MDL   | <MDL       | 0      | 120 |
| CB-191 | <MDL     | -    | <MDL   | <MDL        | 0      | 4.8 | <MDL     | -   | <MDL   | <MDL       | 0      | 4.3 | <MDL     | -   | <MDL   | <MDL        | 0      | 4.3 | <MDL       | -   | <MDL   | <MDL       | 0      | 73  |
| CB-170 | 1.5      | 8.5  | <MDL   | <MDL - 55   | 5.1    | 2.3 | 0.67     | 1.8 | <MDL   | <MDL - 4.7 | 29     | 4.4 | 6.2      | 11  | <MDL   | <MDL - 27   | 29     | 4.4 | <MDL       | -   | <MDL   | <MDL       | 0      | 120 |
| CB-189 | 0.18     | 1.1  | <MDL   | <MDL - 7.2  | 2.6    | 3.8 | <MDL     | -   | <MDL   | <MDL       | 0      | 5.5 | <MDL     | -   | <MDL   | <MDL        | 0      | 5.5 | <MDL       | -   | <MDL   | <MDL       | 0      | 200 |
| CB-202 | 0.30     | 1.9  | <MDL   | <MDL - 12   | 2.6    | 6.0 | <MDL     | -   | <MDL   | <MDL       | 0      | 4.7 | 1.7      | 2.9 | <MDL   | <MDL - 6.2  | 29     | 4.7 | <MDL       | -   | <MDL   | <MDL       | 0      | 160 |
| CB-201 | 0.14     | 0.90 | <MDL   | <MDL - 5.8  | 2.6    | 2.7 | <MDL     | -   | <MDL   | <MDL       | 0      | 7.1 | <MDL     | -   | <MDL   | <MDL        | 14     | 7.1 | <MDL       | -   | <MDL   | <MDL       | 0      | 140 |
| CB-199 | 0.70     | 4.5  | <MDL   | <MDL - 29   | 2.6    | 5.8 | <MDL     | -   | <MDL   | <MDL       | 14     | 6.2 | 3.2      | 6.0 | <MDL   | <MDL - 16   | 29     | 6.2 | <MDL       | -   | <MDL   | <MDL       | 0      | 200 |
| CB-194 | 0.86     | 5.5  | <MDL   | <MDL - 35   | 2.6    | 7.2 | <MDL     | -   | <MDL   | <MDL       | 29     | 4.5 | 3.2      | 5.6 | <MDL   | <MDL - 14   | 29     | 4.5 | <MDL       | -   | <MDL   | <MDL       | 0      | 160 |
| CB-205 | <MDL     | -    | <MDL   | <MDL        | 0      | 5.0 | <MDL     | -   | <MDL   | <MDL       | 0      | 4.6 | <MDL     | -   | <MDL   | <MDL        | 0      | 4.6 | <MDL       | -   | <MDL   | <MDL       | 0      | 140 |
| CB-208 | 0.087    | 0.56 | <MDL   | <MDL - 3.6  | 2.6    | 3.4 | <MDL     | -   | <MDL   | <MDL       | 0      | 2.6 | <MDL     | -   | <MDL   | <MDL        | 0      | 2.6 | <MDL       | -   | <MDL   | <MDL       | 0      | 100 |
| CB-206 | 0.21     | 1.3  | <MDL   | <MDL - 8.5  | 2.6    | 4.6 | <MDL     | -   | <MDL   | <MDL       | 0      | 2.2 | <MDL     | -   | <MDL   | <MDL        | 0      | 2.2 | <MDL       | -   | <MDL   | <MDL       | 0      | 110 |
| CB-209 | 0.21     | 1.3  | <MDL   | <MDL - 8.4  | 2.6    | 6.7 | <MDL     | -   | <MDL   | <MDL       | 0      | 5.5 | 1.5      | 3.9 | <MDL   | <MDL - 10   | 14     | 5.5 | <MDL       | -   | <MDL   | <MDL       | 0      | 47  |
| ΣPCBs  | 63       | 240  | 18     | <MDL - 1500 | 74     |     | 110      | 53  | 120    | 59 - 210   | 100    |     | 410      | 780 | 31     | <MDL - 2100 | 86     |     | 110        | 230 | <MDL   | <MDL - 600 | 29     |     |

**Table S4.** Concentrations of OH-PCBs in cat sera [pg mL<sup>-1</sup>], dry and wet cat food [pg g<sup>-1</sup> wet wt.] and house dust [pg g<sup>-1</sup> dry wt.]

|                       | Cat sera |     |        |            |        |     | Dry food |    |        |       |        |     | Wet food |    |        |       |        |     | House dust |    |        |           |        |     |
|-----------------------|----------|-----|--------|------------|--------|-----|----------|----|--------|-------|--------|-----|----------|----|--------|-------|--------|-----|------------|----|--------|-----------|--------|-----|
| OH-PCBs               | Mean     | SD  | Median | Range      | DF (%) | MDL | Mean     | SD | Median | Range | DF (%) | MDL | Mean     | SD | Median | Range | DF (%) | MDL | Mean       | SD | Median | Range     | DF (%) | MDL |
| 4'OH-CB18             | 21       | 49  | <MDL   | <MDL - 310 | 51     | 1.3 | <MDL     | -  | <MDL   | <MDL  | 0      | 1.0 | <MDL     | -  | <MDL   | <MDL  | 0      | 1.0 | <MDL       | -  | <MDL   | <MDL      | 0      | 16  |
| 4'OH-CB35             | <MDL     | -   | <MDL   | <MDL       | 0      | 1.3 | <MDL     | -  | <MDL   | <MDL  | 0      | 1.0 | <MDL     | -  | <MDL   | <MDL  | 0      | 1.0 | <MDL       | -  | <MDL   | <MDL      | 0      | 16  |
| 3'OH-CB31             | 6.9      | 44  | <MDL   | <MDL - 280 | 2.6    | 1.3 | <MDL     | -  | <MDL   | <MDL  | 0      | 1.0 | <MDL     | -  | <MDL   | <MDL  | 0      | 1.0 | <MDL       | -  | <MDL   | <MDL      | 0      | 16  |
| 3OH-CB25              | <MDL     | -   | <MDL   | <MDL       | 0      | 1.3 | <MDL     | -  | <MDL   | <MDL  | 0      | 1.0 | <MDL     | -  | <MDL   | <MDL  | 0      | 1.0 | <MDL       | -  | <MDL   | <MDL      | 0      | 16  |
| 4'OH-CB20             | <MDL     | -   | <MDL   | <MDL       | 0      | 1.3 | <MDL     | -  | <MDL   | <MDL  | 0      | 1.0 | <MDL     | -  | <MDL   | <MDL  | 0      | 1.0 | <MDL       | -  | <MDL   | <MDL      | 0      | 16  |
| 3'OH-CB28             | <MDL     | -   | <MDL   | <MDL       | 0      | 1.3 | <MDL     | -  | <MDL   | <MDL  | 0      | 1.0 | <MDL     | -  | <MDL   | <MDL  | 0      | 1.0 | <MDL       | -  | <MDL   | <MDL      | 0      | 16  |
| 4OH-CB26              | <MDL     | -   | <MDL   | <MDL       | 0      | 1.3 | <MDL     | -  | <MDL   | <MDL  | 0      | 1.0 | <MDL     | -  | <MDL   | <MDL  | 0      | 1.0 | <MDL       | -  | <MDL   | <MDL      | 0      | 16  |
| 4'OH-CB25/26/4OH-CB31 | 16       | 42  | 7      | <MDL - 270 | 82     | 1.3 | <MDL     | -  | <MDL   | <MDL  | 0      | 1.0 | <MDL     | -  | <MDL   | <MDL  | 0      | 1.0 | <MDL       | -  | <MDL   | <MDL      | 0      | 16  |
| 3'OH-CB74             | <MDL     | -   | <MDL   | <MDL       | 0      | 5.7 | <MDL     | -  | <MDL   | <MDL  | 0      | 1.0 | <MDL     | -  | <MDL   | <MDL  | 0      | 1.0 | <MDL       | -  | <MDL   | <MDL      | 0      | 150 |
| 4'OH-CB72             | 18       | 15  | 14     | <MDL - 53  | 82     | 5.7 | <MDL     | -  | <MDL   | <MDL  | 0      | 1.0 | <MDL     | -  | <MDL   | <MDL  | 0      | 1.0 | <MDL       | -  | <MDL   | <MDL      | 0      | 150 |
| 3'OH-CB53             | <MDL     | -   | <MDL   | <MDL       | 0      | 5.7 | <MDL     | -  | <MDL   | <MDL  | 0      | 1.0 | <MDL     | -  | <MDL   | <MDL  | 0      | 1.0 | <MDL       | -  | <MDL   | <MDL      | 0      | 150 |
| 4'OH-CB65             | <MDL     | -   | <MDL   | <MDL       | 0      | 5.7 | <MDL     | -  | <MDL   | <MDL  | 0      | 1.0 | <MDL     | -  | <MDL   | <MDL  | 0      | 1.0 | <MDL       | -  | <MDL   | <MDL      | 0      | 150 |
| 4'OH-CB61             | 3.2      | 6.5 | <MDL   | <MDL - 31  | 28     | 5.7 | <MDL     | -  | <MDL   | <MDL  | 0      | 1.0 | <MDL     | -  | <MDL   | <MDL  | 0      | 1.0 | <MDL       | -  | <MDL   | <MDL      | 0      | 150 |
| 4'OH-CB79             | <MDL     | -   | <MDL   | <MDL       | 0      | 5.7 | <MDL     | -  | <MDL   | <MDL  | 0      | 1.0 | <MDL     | -  | <MDL   | <MDL  | 0      | 1.0 | <MDL       | -  | <MDL   | <MDL      | 0      | 150 |
| 4OH-CB63              | 0.18     | 1.2 | <MDL   | <MDL - 7.6 | 2.6    | 5.7 | <MDL     | -  | <MDL   | <MDL  | 0      | 1.0 | <MDL     | -  | <MDL   | <MDL  | 0      | 1.0 | <MDL       | -  | <MDL   | <MDL      | 0      | 150 |
| 3OH-CB66              | <MDL     | -   | <MDL   | <MDL       | 0      | 5.7 | <MDL     | -  | <MDL   | <MDL  | 0      | 1.0 | <MDL     | -  | <MDL   | <MDL  | 0      | 1.0 | <MDL       | -  | <MDL   | <MDL      | 0      | 150 |
| 4OH-CB70              | 14       | 14  | 12     | <MDL - 52  | 69     | 5.7 | <MDL     | -  | <MDL   | <MDL  | 0      | 1.0 | <MDL     | -  | <MDL   | <MDL  | 0      | 1.0 | <MDL       | -  | <MDL   | <MDL      | 0      | 150 |
| 2OH-CB114             | 1.3      | 8.6 | <MDL   | <MDL - 55  | 2.6    | 15  | <MDL     | -  | <MDL   | <MDL  | 0      | 1.8 | <MDL     | -  | <MDL   | <MDL  | 0      | 1.8 | <MDL       | -  | <MDL   | <MDL      | 0      | 21  |
| 4OH-CB97              | <MDL     | -   | <MDL   | <MDL       | 0      | 15  | <MDL     | -  | <MDL   | <MDL  | 0      | 1.8 | <MDL     | -  | <MDL   | <MDL  | 0      | 1.8 | <MDL       | -  | <MDL   | <MDL      | 0      | 21  |
| 4OH-CB127             | <MDL     | -   | <MDL   | <MDL       | 0      | 15  | <MDL     | -  | <MDL   | <MDL  | 0      | 1.8 | <MDL     | -  | <MDL   | <MDL  | 0      | 1.8 | <MDL       | -  | <MDL   | <MDL      | 0      | 21  |
| 3OH-CB118             | 5.7      | 21  | <MDL   | <MDL - 130 | 10     | 15  | <MDL     | -  | <MDL   | <MDL  | 0      | 1.8 | <MDL     | -  | <MDL   | <MDL  | 0      | 1.8 | 14         | 36 | <MDL   | <MDL - 95 | 14     | 21  |
| 4'OH-CB106            | <MDL     | -   | <MDL   | <MDL       | 0      | 15  | <MDL     | -  | <MDL   | <MDL  | 0      | 1.8 | <MDL     | -  | <MDL   | <MDL  | 0      | 1.8 | <MDL       | -  | <MDL   | <MDL      | 0      | 21  |
| 2OH-CB101             | <MDL     | -   | <MDL   | <MDL       | 0      | 15  | <MDL     | -  | <MDL   | <MDL  | 0      | 1.8 | <MDL     | -  | <MDL   | <MDL  | 0      | 1.8 | <MDL       | -  | <MDL   | <MDL      | 0      | 21  |
| 4OH-CB121             | <MDL     | -   | <MDL   | <MDL       | 0      | 15  | <MDL     | -  | <MDL   | <MDL  | 0      | 1.8 | <MDL     | -  | <MDL   | <MDL  | 0      | 1.8 | <MDL       | -  | <MDL   | <MDL      | 0      | 21  |
| 3OH-CB101             | 0.51     | 3.3 | <MDL   | <MDL - 21  | 2.6    | 15  | <MDL     | -  | <MDL   | <MDL  | 0      | 1.8 | <MDL     | -  | <MDL   | <MDL  | 0      | 1.8 | <MDL       | -  | <MDL   | <MDL      | 0      | 21  |
| 4OH-CB107             | <MDL     | -   | <MDL   | <MDL       | 0      | 15  | <MDL     | -  | <MDL   | <MDL  | 0      | 1.8 | <MDL     | -  | <MDL   | <MDL  | 0      | 1.8 | <MDL       | -  | <MDL   | <MDL      | 0      | 21  |
| 4OH-CB108             | <MDL     | -   | <MDL   | <MDL       | 0      | 15  | <MDL     | -  | <MDL   | <MDL  | 0      | 1.8 | <MDL     | -  | <MDL   | <MDL  | 0      | 1.8 | <MDL       | -  | <MDL   | <MDL      | 0      | 21  |
| 4OH-CB120             | 0.48     | 3.1 | <MDL   | <MDL - 20  | 2.6    | 15  | <MDL     | -  | <MDL   | <MDL  | 0      | 1.8 | <MDL     | -  | <MDL   | <MDL  | 0      | 1.8 | <MDL       | -  | <MDL   | <MDL      | 0      | 21  |
| 4OH-CB101             | 4.4      | 13  | <MDL   | <MDL - 79  | 21     | 4.0 | <MDL     | -  | <MDL   | <MDL  | 0      | 1.8 | <MDL     | -  | <MDL   | <MDL  | 0      | 1.8 | <MDL       | -  | <MDL   | <MDL      | 0      | 21  |
| 4OH-CB146             | <MDL     | -   | <MDL   | <MDL       | 0      | 4.0 | <MDL     | -  | <MDL   | <MDL  | 0      | 1.8 | <MDL     | -  | <MDL   | <MDL  | 0      | 1.8 | <MDL       | -  | <MDL   | <MDL      | 0      | 60  |
| 4OH-CB130             | <MDL     | -   | <MDL   | <MDL       | 0      | 4.0 | <MDL     | -  | <MDL   | <MDL  | 0      | 1.8 | <MDL     | -  | <MDL   | <MDL  | 0      | 1.8 | <MDL       | -  | <MDL   | <MDL      | 0      | 60  |

|           |      |     |      |           |    |     |      |   |      |      |   |     |      |   |      |      |   |     |      |   |      |      |   |    |
|-----------|------|-----|------|-----------|----|-----|------|---|------|------|---|-----|------|---|------|------|---|-----|------|---|------|------|---|----|
| 4OH-CB159 | <MDL | -   | <MDL | <MDL      | 0  | 4.0 | <MDL | - | <MDL | <MDL | 0 | 1.8 | <MDL | - | <MDL | <MDL | 0 | 1.8 | <MDL | - | <MDL | <MDL | 0 | 60 |
| 4OH-CB162 | 2.3  | 3.9 | <MDL | <MDL - 14 | 31 | 4.0 | <MDL | - | <MDL | <MDL | 0 | 1.8 | <MDL | - | <MDL | <MDL | 0 | 1.8 | <MDL | - | <MDL | <MDL | 0 | 60 |
| 4OH-CB134 | <MDL | -   | <MDL | <MDL      | 0  | 4.0 | <MDL | - | <MDL | <MDL | 0 | 1.8 | <MDL | - | <MDL | <MDL | 0 | 1.8 | <MDL | - | <MDL | <MDL | 0 | 60 |

**Table S4.** Concentrations of OH-PCBs in cat sera [ $\text{pg mL}^{-1}$ ], dry and wet cat food [ $\text{pg g}^{-1}$  wet wt.] and house dust [ $\text{pg g}^{-1}$  dry wt.] (Continued)

| OH-PCBs              | Cat sera |     |        |            |        |     | Dry food |    |        |       |        |     | Wet food |    |        |       |        |     | House dust |    |        |           |        |     |
|----------------------|----------|-----|--------|------------|--------|-----|----------|----|--------|-------|--------|-----|----------|----|--------|-------|--------|-----|------------|----|--------|-----------|--------|-----|
|                      | Mean     | SD  | Median | Range      | DF (%) | MDL | Mean     | SD | Median | Range | DF (%) | MDL | Mean     | SD | Median | Range | DF (%) | MDL | Mean       | SD | Median | Range     | DF (%) | MDL |
| 3OH-CB138            | <MDL     | -   | <MDL   | <MDL       | 0      | 4.0 | <MDL     | -  | <MDL   | <MDL  | 0      | 1.8 | <MDL     | -  | <MDL   | <MDL  | 0      | 1.8 | <MDL       | -  | <MDL   | <MDL      | 0      | 60  |
| 4OH-CB163            | <MDL     | -   | <MDL   | <MDL       | 0      | 4.0 | <MDL     | -  | <MDL   | <MDL  | 0      | 1.8 | <MDL     | -  | <MDL   | <MDL  | 0      | 1.8 | <MDL       | -  | <MDL   | <MDL      | 0      | 60  |
| 4OH-CB165            | 0.29     | 1.9 | <MDL   | <MDL - 12  | 2.6    | 4.0 | <MDL     | -  | <MDL   | <MDL  | 0      | 1.8 | <MDL     | -  | <MDL   | <MDL  | 0      | 1.8 | <MDL       | -  | <MDL   | <MDL      | 0      | 60  |
| 3OH-CB153            | 0.24     | 1.5 | <MDL   | <MDL - 9.7 | 2.6    | 4.0 | <MDL     | -  | <MDL   | <MDL  | 0      | 1.8 | <MDL     | -  | <MDL   | <MDL  | 0      | 1.8 | <MDL       | -  | <MDL   | <MDL      | 0      | 60  |
| 5OH-CB138            | <MDL     | -   | <MDL   | <MDL       | 0      | 4.0 | <MDL     | -  | <MDL   | <MDL  | 0      | 1.8 | <MDL     | -  | <MDL   | <MDL  | 0      | 1.8 | <MDL       | -  | <MDL   | <MDL      | 0      | 60  |
| 3OH-CB184            | <MDL     | -   | <MDL   | <MDL       | 0      | 4.0 | <MDL     | -  | <MDL   | <MDL  | 0      | 1.8 | <MDL     | -  | <MDL   | <MDL  | 0      | 1.8 | <MDL       | -  | <MDL   | <MDL      | 0      | 60  |
| 4OH-CB187            | 1.1      | 7.2 | <MDL   | <MDL - 46  | 2.6    | 4.0 | <MDL     | -  | <MDL   | <MDL  | 0      | 1.8 | <MDL     | -  | <MDL   | <MDL  | 0      | 1.8 | <MDL       | -  | <MDL   | <MDL      | 0      | 60  |
| 3OH-CB180            | <MDL     | -   | <MDL   | <MDL       | 0      | 4.0 | <MDL     | -  | <MDL   | <MDL  | 0      | 1.8 | <MDL     | -  | <MDL   | <MDL  | 0      | 1.8 | <MDL       | -  | <MDL   | <MDL      | 0      | 60  |
| 4OH-CB172            | <MDL     | -   | <MDL   | <MDL       | 0      | 4.0 | <MDL     | -  | <MDL   | <MDL  | 0      | 1.8 | <MDL     | -  | <MDL   | <MDL  | 0      | 1.8 | <MDL       | -  | <MDL   | <MDL      | 0      | 60  |
| 4OH-CB193            | <MDL     | -   | <MDL   | <MDL       | 0      | 4.0 | <MDL     | -  | <MDL   | <MDL  | 0      | 1.8 | <MDL     | -  | <MDL   | <MDL  | 0      | 1.8 | <MDL       | -  | <MDL   | <MDL      | 0      | 60  |
| 4OH-CB178            | <MDL     | -   | <MDL   | <MDL       | 0      | 4.0 | <MDL     | -  | <MDL   | <MDL  | 0      | 1.8 | <MDL     | -  | <MDL   | <MDL  | 0      | 1.8 | <MDL       | -  | <MDL   | <MDL      | 0      | 60  |
| 4OH-CB177            | <MDL     | -   | <MDL   | <MDL       | 0      | 4.0 | <MDL     | -  | <MDL   | <MDL  | 0      | 1.8 | <MDL     | -  | <MDL   | <MDL  | 0      | 1.8 | <MDL       | -  | <MDL   | <MDL      | 0      | 60  |
| 5OH-CB183            | 0.72     | 4.6 | <MDL   | <MDL - 29  | 0      | 4.0 | <MDL     | -  | <MDL   | <MDL  | 0      | 1.8 | <MDL     | -  | <MDL   | <MDL  | 0      | 1.8 | <MDL       | -  | <MDL   | <MDL      | 0      | 60  |
| 3'OH-CB182/3OH-CB183 | <MDL     | -   | <MDL   | <MDL       | 0      | 4.0 | <MDL     | -  | <MDL   | <MDL  | 0      | 1.8 | <MDL     | -  | <MDL   | <MDL  | 0      | 1.8 | <MDL       | -  | <MDL   | <MDL      | 0      | 60  |
| 4OH-CB202            | <MDL     | -   | <MDL   | <MDL       | 0      | 4.0 | <MDL     | -  | <MDL   | <MDL  | 0      | 1.8 | <MDL     | -  | <MDL   | <MDL  | 0      | 1.8 | <MDL       | -  | <MDL   | <MDL      | 0      | 60  |
| 4OH-CB199            | <MDL     | -   | <MDL   | <MDL       | 0      | 4.0 | <MDL     | -  | <MDL   | <MDL  | 0      | 1.8 | <MDL     | -  | <MDL   | <MDL  | 0      | 1.8 | <MDL       | -  | <MDL   | <MDL      | 0      | 60  |
| 4OH-CB201            | <MDL     | -   | <MDL   | <MDL       | 0      | 4.0 | <MDL     | -  | <MDL   | <MDL  | 0      | 1.8 | <MDL     | -  | <MDL   | <MDL  | 0      | 1.8 | <MDL       | -  | <MDL   | <MDL      | 0      | 60  |
| 4OH-CB200            | <MDL     | -   | <MDL   | <MDL       | 0      | 4.0 | <MDL     | -  | <MDL   | <MDL  | 0      | 1.8 | <MDL     | -  | <MDL   | <MDL  | 0      | 1.8 | <MDL       | -  | <MDL   | <MDL      | 0      | 60  |
| 3OH-CB203            | <MDL     | -   | <MDL   | <MDL       | 0      | 4.0 | <MDL     | -  | <MDL   | <MDL  | 0      | 1.8 | <MDL     | -  | <MDL   | <MDL  | 0      | 1.8 | <MDL       | -  | <MDL   | <MDL      | 0      | 60  |
| 4OH-CB198            | <MDL     | -   | <MDL   | <MDL       | 0      | 4.0 | <MDL     | -  | <MDL   | <MDL  | 0      | 1.8 | <MDL     | -  | <MDL   | <MDL  | 0      | 1.8 | <MDL       | -  | <MDL   | <MDL      | 0      | 60  |
| <b>ΣOH-PCBs</b>      | 97       | 150 | 59     | 1.9 - 1000 | 100    |     | <MDL     | -  | <MDL   | <MDL  | 0      |     | <MDL     | -  | <MDL   | <MDL  | 0      |     | 14         | 36 | <MDL   | <MDL - 95 | 14     |     |



**Table S5.** Concentrations of OH-PBDEs in cat sera [pg mL<sup>-1</sup>], dry and wet cat food [pg g<sup>-1</sup> wet wt.] and house dust [pg g<sup>-1</sup> dry wt.]

|             | Cat sera |     |        |            |        |     | Dry food |    |        |       |        |     | Wet food |    |        |            |        |     | House dust |    |        |       |        |     |
|-------------|----------|-----|--------|------------|--------|-----|----------|----|--------|-------|--------|-----|----------|----|--------|------------|--------|-----|------------|----|--------|-------|--------|-----|
| OH-PBDEs    | Mean     | SD  | Median | Range      | DF (%) | MDL | Mean     | SD | Median | Range | DF (%) | MDL | Mean     | SD | Median | Range      | DF (%) | MDL | Mean       | SD | Median | Range | DF (%) | MDL |
| 2'OH-BDE28  | <MDL     | -   | <MDL   | <MDL       | 0      | 3.4 | <MDL     | -  | <MDL   | <MDL  | 0      | 25  | <MDL     | -  | <MDL   | <MDL       | 0      | 25  | <MDL       | -  | <MDL   | <MDL  | 0      | 18  |
| 3'OH-BDE28  | <MDL     | -   | <MDL   | <MDL       | 0      | 3.4 | <MDL     | -  | <MDL   | <MDL  | 0      | 25  | <MDL     | -  | <MDL   | <MDL       | 0      | 25  | <MDL       | -  | <MDL   | <MDL  | 0      | 18  |
| 4'OH-BDE17  | <MDL     | -   | <MDL   | <MDL       | 0      | 3.4 | <MDL     | -  | <MDL   | <MDL  | 0      | 25  | <MDL     | -  | <MDL   | <MDL       | 0      | 25  | <MDL       | -  | <MDL   | <MDL  | 0      | 18  |
| 6'OH-BDE49  | <MDL     | -   | <MDL   | <MDL       | 0      | 3.4 | <MDL     | -  | <MDL   | <MDL  | 0      | 25  | <MDL     | -  | <MDL   | <MDL       | 0      | 25  | <MDL       | -  | <MDL   | <MDL  | 0      | 18  |
| 2'OH-BDE68  | 26       | 41  | 16     | <MDL - 190 | 74     | 3.4 | <MDL     | -  | <MDL   | <MDL  | 0      | 25  | 17       | 46 | <MDL   | <MDL - 120 | 14     | 25  | <MDL       | -  | <MDL   | <MDL  | 0      | 18  |
| 6OH-BDE47   | 84       | 82  | 55     | 9.9 - 370  | 100    | 3.4 | <MDL     | -  | <MDL   | <MDL  | 0      | 8.2 | 6.7      | 13 | <MDL   | <MDL - 35  | 29     | 8.2 | <MDL       | -  | <MDL   | <MDL  | 0      | 12  |
| 3OH-BDE47   | <MDL     | -   | <MDL   | <MDL       | 0      | 3.4 | <MDL     | -  | <MDL   | <MDL  | 0      | 8.2 | <MDL     | -  | <MDL   | <MDL       | 0      | 8.2 | <MDL       | -  | <MDL   | <MDL  | 0      | 12  |
| 5OH-BDE47   | <MDL     | -   | <MDL   | <MDL       | 0      | 3.4 | <MDL     | -  | <MDL   | <MDL  | 0      | 8.2 | <MDL     | -  | <MDL   | <MDL       | 0      | 8.2 | <MDL       | -  | <MDL   | <MDL  | 0      | 12  |
| 4OH-BDE49   | <MDL     | -   | <MDL   | <MDL       | 0      | 3.4 | <MDL     | -  | <MDL   | <MDL  | 0      | 8.2 | <MDL     | -  | <MDL   | <MDL       | 0      | 8.2 | <MDL       | -  | <MDL   | <MDL  | 0      | 12  |
| 4'OH-BDE42  | <MDL     | -   | <MDL   | <MDL       | 0      | 3.4 | <MDL     | -  | <MDL   | <MDL  | 0      | 8.2 | <MDL     | -  | <MDL   | <MDL       | 0      | 8.2 | <MDL       | -  | <MDL   | <MDL  | 0      | 12  |
| 5'OH-BDE100 | <MDL     | -   | <MDL   | <MDL       | 0      | 3.4 | <MDL     | -  | <MDL   | <MDL  | 0      | 8.2 | <MDL     | -  | <MDL   | <MDL       | 0      | 8.2 | <MDL       | -  | <MDL   | <MDL  | 0      | 12  |
| 4'OH-BDE103 | <MDL     | -   | <MDL   | <MDL       | 0      | 3.4 | <MDL     | -  | <MDL   | <MDL  | 0      | 8.2 | <MDL     | -  | <MDL   | <MDL       | 0      | 8.2 | <MDL       | -  | <MDL   | <MDL  | 0      | 12  |
| 6OH-BDE99   | <MDL     | -   | <MDL   | <MDL       | 0      | 3.4 | <MDL     | -  | <MDL   | <MDL  | 0      | 8.2 | <MDL     | -  | <MDL   | <MDL       | 0      | 8.2 | <MDL       | -  | <MDL   | <MDL  | 0      | 12  |
| 5'OH-BDE99  | <MDL     | -   | <MDL   | <MDL       | 0      | 3.4 | <MDL     | -  | <MDL   | <MDL  | 0      | 8.2 | <MDL     | -  | <MDL   | <MDL       | 0      | 8.2 | <MDL       | -  | <MDL   | <MDL  | 0      | 12  |
| 4OH-BDE90   | <MDL     | -   | <MDL   | <MDL       | 0      | 3.4 | <MDL     | -  | <MDL   | <MDL  | 0      | 8.2 | <MDL     | -  | <MDL   | <MDL       | 0      | 8.2 | <MDL       | -  | <MDL   | <MDL  | 0      | 12  |
| 4'OH-BDE101 | <MDL     | -   | <MDL   | <MDL       | 0      | 3.4 | <MDL     | -  | <MDL   | <MDL  | 0      | 8.2 | <MDL     | -  | <MDL   | <MDL       | 0      | 8.2 | <MDL       | -  | <MDL   | <MDL  | 0      | 12  |
| ΣOH-PBDEs   | 110      | 100 | 77     | 9.9 - 440  | 100    |     | <MDL     | -  | <MDL   | <MDL  | 0      |     | 24       | 59 | <MDL   | <MDL - 160 | 29     |     | <MDL       | -  | <MDL   | <MDL  | 0      |     |

**Table S6.** Concentrations of MeO-PBDEs in cat sera [pg mL<sup>-1</sup>], dry and wet cat food [pg g<sup>-1</sup> wet wt.] and house dust [pg g<sup>-1</sup> dry wt.]

|              | Cat sera |      |        |            |        |     | Dry food |    |        |           |        |     | Wet food |      |        |             |        |     | House dust |    |        |       |        |     |
|--------------|----------|------|--------|------------|--------|-----|----------|----|--------|-----------|--------|-----|----------|------|--------|-------------|--------|-----|------------|----|--------|-------|--------|-----|
| MeO-PBDEs    | Mean     | SD   | Median | Range      | DF (%) | MDL | Mean     | SD | Median | Range     | DF (%) | MDL | Mean     | SD   | Median | Range       | DF (%) | MDL | Mean       | SD | Median | Range | DF (%) | MDL |
| 2'MeO-BDE28  | <MDL     | <MDL | <MDL   | <MDL       | 0      | 3.4 | <MDL     | -  | <MDL   | <MDL      | 0      | 25  | <MDL     | -    | <MDL   | <MDL        | 0      | 25  | <MDL       | -  | <MDL   | <MDL  | 0      | 290 |
| 3'MeO-BDE28  | <MDL     | <MDL | <MDL   | <MDL       | 0      | 3.4 | <MDL     | -  | <MDL   | <MDL      | 0      | 25  | <MDL     | -    | <MDL   | <MDL        | 0      | 25  | <MDL       | -  | <MDL   | <MDL  | 0      | 290 |
| 4'MeO-BDE17  | <MDL     | <MDL | <MDL   | <MDL       | 0      | 3.4 | <MDL     | -  | <MDL   | <MDL      | 0      | 25  | <MDL     | -    | <MDL   | <MDL        | 0      | 25  | <MDL       | -  | <MDL   | <MDL  | 0      | 290 |
| 6'MeO-BDE49  | <MDL     | <MDL | <MDL   | <MDL       | 0      | 3.4 | <MDL     | -  | <MDL   | <MDL      | 0      | 25  | <MDL     | -    | <MDL   | <MDL        | 0      | 25  | <MDL       | -  | <MDL   | <MDL  | 0      | 290 |
| 2'MeO-BDE68  | 22       | 29   | 14     | <MDL - 130 | 59     | 3.4 | <MDL     | -  | <MDL   | <MDL      | 0      | 25  | 490      | 1000 | 71     | <MDL - 2800 | 71     | 25  | <MDL       | -  | <MDL   | <MDL  | 0      | 290 |
| 6MeO-BDE47   | 27       | 68   | <MDL   | <MDL - 380 | 28     | 3.4 | 12       | 12 | 18     | <MDL - 25 | 57     | 8.2 | 83       | 160  | 17     | <MDL - 420  | 57     | 8.2 | <MDL       | -  | <MDL   | <MDL  | 0      | 98  |
| 3MeO-BDE47   | <MDL     | <MDL | <MDL   | <MDL       | 0      | 3.4 | <MDL     | -  | <MDL   | <MDL      | 0      | 8.2 | <MDL     | -    | <MDL   | <MDL        | 0      | 8.2 | <MDL       | -  | <MDL   | <MDL  | 0      | 98  |
| 5MeO-BDE47   | <MDL     | <MDL | <MDL   | <MDL       | 0      | 3.4 | <MDL     | -  | <MDL   | <MDL      | 0      | 8.2 | <MDL     | -    | <MDL   | <MDL        | 0      | 8.2 | <MDL       | -  | <MDL   | <MDL  | 0      | 98  |
| 4MeO-BDE49   | <MDL     | <MDL | <MDL   | <MDL       | 0      | 3.4 | <MDL     | -  | <MDL   | <MDL      | 0      | 8.2 | <MDL     | -    | <MDL   | <MDL        | 0      | 8.2 | <MDL       | -  | <MDL   | <MDL  | 0      | 98  |
| 4'MeO-BDE42  | <MDL     | <MDL | <MDL   | <MDL       | 0      | 3.4 | <MDL     | -  | <MDL   | <MDL      | 0      | 8.2 | <MDL     | -    | <MDL   | <MDL        | 0      | 8.2 | <MDL       | -  | <MDL   | <MDL  | 0      | 98  |
| 5'MeO-BDE100 | <MDL     | <MDL | <MDL   | <MDL       | 0      | 3.4 | <MDL     | -  | <MDL   | <MDL      | 0      | 8.2 | <MDL     | -    | <MDL   | <MDL        | 0      | 8.2 | <MDL       | -  | <MDL   | <MDL  | 0      | 98  |
| 4'MeO-BDE103 | <MDL     | <MDL | <MDL   | <MDL       | 0      | 3.4 | <MDL     | -  | <MDL   | <MDL      | 0      | 8.2 | <MDL     | -    | <MDL   | <MDL        | 0      | 8.2 | <MDL       | -  | <MDL   | <MDL  | 0      | 98  |
| 6MeO-BDE99   | 0.30     | 1.9  | <MDL   | <MDL - 12  | 2.6    | 3.4 | <MDL     | -  | <MDL   | <MDL      | 0      | 8.2 | <MDL     | -    | <MDL   | <MDL        | 0      | 8.2 | <MDL       | -  | <MDL   | <MDL  | 0      | 98  |
| 5'MeO-BDE99  | <MDL     | <MDL | <MDL   | <MDL       | 0      | 3.4 | <MDL     | -  | <MDL   | <MDL      | 0      | 8.2 | <MDL     | -    | <MDL   | <MDL        | 0      | 8.2 | <MDL       | -  | <MDL   | <MDL  | 0      | 98  |
| 4MeO-BDE90   | <MDL     | <MDL | <MDL   | <MDL       | 0      | 3.4 | <MDL     | -  | <MDL   | <MDL      | 0      | 8.2 | <MDL     | -    | <MDL   | <MDL        | 0      | 8.2 | <MDL       | -  | <MDL   | <MDL  | 0      | 98  |
| 4'MeO-BDE101 | <MDL     | <MDL | <MDL   | <MDL       | 0      | 3.4 | <MDL     | -  | <MDL   | <MDL      | 0      | 8.2 | <MDL     | -    | <MDL   | <MDL        | 0      | 8.2 | <MDL       | -  | <MDL   | <MDL  | 0      | 98  |
| ΣMeO-PBDEs   | 49       | 82   | 19     | <MDL - 460 | 62     |     | 12       | 12 | 18     | <MDL - 25 | 57     |     | 520      | 1200 | <MDL   | <MDL - 3300 | 29     |     | <MDL       | -  | <MDL   | <MDL  | 0      |     |

**Table S7.** Lipid-based concentrations (ng g<sup>-1</sup>) of OHCs in cat serum (*n* = 26)

| Compound                  | Median (Range)             | DF (%)     |
|---------------------------|----------------------------|------------|
| BDE-47                    | <MDL (<MDL-47)             | 38         |
| BDE-99                    | <MDL (<MDL-64)             | 33         |
| BDE-209                   | 170 (<MDL-16000)           | 92         |
| <b>ΣPBDEs</b>             | <b>230 (&lt;MDL-21000)</b> | <b>96</b>  |
| CB-153                    | 3.7 (<MDL-230)             | 58         |
| CB-138                    | 1.3 (<MDL-170)             | 50         |
| <b>ΣPCBs</b>              | <b>10 (&lt;MDL-1000)</b>   | <b>79</b>  |
| 4'-OH-CB-25/26/4-OH-CB-31 | 3 (<MDL-150)               | 88         |
| 4'-OH-CB-72               | 5.8 (<MDL-38)              | 88         |
| <b>ΣOH-PCBs</b>           | <b>23 (0.79-550)</b>       | <b>100</b> |
| 2'-OH-BDE-68              | 7.7 (<MDL-120)             | 83         |
| 6-OH-BDE-47               | 22 (4.3-160)               | 100        |
| <b>ΣOH-PBDEs</b>          | <b>27 (7.8-270)</b>        | <b>100</b> |
| 2'-MeO-BDE-68             | 6.8 (<MDL-87)              | 79         |
| 6-MeO-BDE-47              | <MDL (<MDL-160)            | 46         |
| <b>ΣMeO-PBDEs</b>         | <b>12 (&lt;MDL-190)</b>    | <b>79</b>  |

**Table S8.** Correlations between the concentrations [wet wt. base] of OHCs in cat sera and the results of questionnaires

|             |                         | PBDEs        | BDE-47       | BDE-99       | BDE-209      | PCBs         | OH-PCBs      | OH-PBDEs     | MeO-PBDEs    | Age [year]   | Weight [kg]  | Ratio A       | Ratio B       |
|-------------|-------------------------|--------------|--------------|--------------|--------------|--------------|--------------|--------------|--------------|--------------|--------------|---------------|---------------|
| PBDEs       | Correlation coefficient |              | 0.096        | 0.268        | <b>0.850</b> | -0.057       | 0.118        | 0.196        | 0.093        | -0.045       | -0.129       | -0.007        | 0.109         |
|             | <i>p</i> -value         |              | 0.549        | 0.090        | <b>0.000</b> | 0.726        | 0.459        | 0.219        | 0.563        | 0.782        | 0.421        | 0.967         | 0.496         |
| BDE-47      | Correlation coefficient | 0.096        |              | <b>0.717</b> | 0.134        | <b>0.717</b> | 0.303        | 0.278        | 0.305        | <b>0.357</b> | 0.030        | -0.060        | 0.194         |
|             | <i>p</i> -value         | 0.549        |              | <b>0.000</b> | 0.405        | <b>0.000</b> | 0.054        | 0.078        | 0.053        | <b>0.022</b> | 0.853        | 0.710         | 0.224         |
| BDE-99      | Correlation coefficient | 0.268        | <b>0.717</b> |              | 0.285        | <b>0.530</b> | <b>0.326</b> | 0.170        | 0.126        | 0.213        | -0.109       | 0.072         | -0.099        |
|             | <i>p</i> -value         | 0.090        | <b>0.000</b> |              | 0.071        | <b>0.000</b> | <b>0.038</b> | 0.287        | 0.434        | 0.181        | 0.496        | 0.655         | 0.540         |
| BDE-209     | Correlation coefficient | <b>0.850</b> | 0.134        | 0.285        |              | -0.089       | 0.047        | 0.291        | 0.257        | 0.070        | -0.069       | 0.009         | 0.139         |
|             | <i>p</i> -value         | <b>0.000</b> | 0.405        | 0.071        |              | 0.580        | 0.769        | 0.065        | 0.105        | 0.666        | 0.668        | 0.956         | 0.385         |
| PCBs        | Correlation coefficient | -0.057       | <b>0.717</b> | <b>0.530</b> | -0.089       |              | <b>0.337</b> | 0.190        | <b>0.331</b> | <b>0.352</b> | 0.026        | -0.036        | 0.022         |
|             | <i>p</i> -value         | 0.726        | <b>0.000</b> | <b>0.000</b> | 0.580        |              | <b>0.031</b> | 0.233        | <b>0.035</b> | <b>0.024</b> | 0.873        | 0.822         | 0.892         |
| OH-PCBs     | Correlation coefficient | 0.118        | 0.303        | <b>0.326</b> | 0.047        | <b>0.337</b> |              | <b>0.333</b> | -0.055       | 0.286        | -0.054       | -0.212        | 0.146         |
|             | <i>p</i> -value         | 0.459        | 0.054        | <b>0.038</b> | 0.769        | <b>0.031</b> |              | <b>0.034</b> | 0.733        | 0.070        | 0.739        | 0.184         | 0.363         |
| OH-PBDEs    | Correlation coefficient | 0.196        | 0.278        | 0.170        | 0.291        | 0.190        | <b>0.333</b> |              | <b>0.364</b> | 0.120        | 0.114        | -0.280        | 0.252         |
|             | <i>p</i> -value         | 0.219        | 0.078        | 0.287        | 0.065        | 0.233        | <b>0.034</b> |              | <b>0.019</b> | 0.456        | 0.476        | 0.076         | 0.112         |
| MeO-PBDEs   | Correlation coefficient | 0.093        | 0.305        | 0.126        | 0.257        | <b>0.331</b> | -0.055       | <b>0.364</b> |              | 0.123        | <b>0.317</b> | 0.052         | 0.109         |
|             | <i>p</i> -value         | 0.563        | 0.053        | 0.434        | 0.105        | <b>0.035</b> | 0.733        | <b>0.019</b> |              | 0.443        | <b>0.043</b> | 0.745         | 0.499         |
| Age [year]  | Correlation coefficient | -0.045       | <b>0.357</b> | 0.213        | 0.070        | <b>0.352</b> | 0.286        | 0.120        | 0.123        |              | <b>0.453</b> | -0.185        | <b>0.457</b>  |
|             | <i>p</i> -value         | 0.782        | <b>0.022</b> | 0.181        | 0.666        | <b>0.024</b> | 0.070        | 0.456        | 0.443        |              | <b>0.003</b> | 0.248         | <b>0.003</b>  |
| Weight [kg] | Correlation coefficient | -0.129       | 0.030        | -0.109       | -0.069       | 0.026        | -0.054       | 0.114        | <b>0.317</b> | <b>0.453</b> |              | -0.129        | <b>0.364</b>  |
|             | <i>p</i> -value         | 0.421        | 0.853        | 0.496        | 0.668        | 0.873        | 0.739        | 0.476        | <b>0.043</b> | <b>0.003</b> |              | 0.420         | <b>0.019</b>  |
| Ratio A*    | Correlation coefficient | -0.007       | -0.060       | 0.072        | 0.009        | -0.036       | -0.212       | -0.280       | 0.052        | -0.185       | -0.129       |               | <b>-0.749</b> |
|             | <i>p</i> -value         | 0.967        | 0.710        | 0.655        | 0.956        | 0.822        | 0.184        | 0.076        | 0.745        | 0.248        | 0.420        |               | <b>0.000</b>  |
| Ratio B**   | Correlation coefficient | 0.109        | 0.194        | -0.099       | 0.139        | 0.022        | 0.146        | 0.252        | 0.109        | <b>0.457</b> | <b>0.364</b> | <b>-0.749</b> |               |
|             | <i>p</i> -value         | 0.496        | 0.224        | 0.540        | 0.385        | 0.892        | 0.363        | 0.112        | 0.499        | <b>0.003</b> | <b>0.019</b> | <b>0.000</b>  |               |

\*Ratio A was calculated by weekly feed number of times of dry food divided by total feed number of times.

\*\*Ratio B was calculated by weekly feed number of times of wet food divided by total feed number of times.

**Table S9.** Correlations between the concentrations [lipid wt. base] of OHCs in cat sera and the results of questionnaires\*

|             |                         | PBDEs         | BDE-47       | BDE-99        | BDE-209       | PCBs         | OH-PCBs       | OH-PBDEs      | MeO-PBDEs | Age [year]   | Weight [kg]   | Lipid         | Ratio A       | Ratio B      |
|-------------|-------------------------|---------------|--------------|---------------|---------------|--------------|---------------|---------------|-----------|--------------|---------------|---------------|---------------|--------------|
| PBDEs       | Correlation coefficient |               | 0.301        | 0.305         | 0.201         | -0.045       | 0.356         | <b>0.481</b>  | 0.128     | -0.263       | <b>-0.459</b> | <b>-0.456</b> | -0.081        | -0.126       |
|             | <i>p</i> -value         |               | 0.153        | 0.148         | 0.347         | 0.836        | 0.089         | 0.018         | 0.550     | 0.214        | <b>0.025</b>  | 0.026         | 0.707         | 0.557        |
| BDE-47      | Correlation coefficient | 0.301         |              | <b>0.767</b>  | 0.061         | 0.158        | 0.301         | 0.164         | 0.108     | 0.059        | -0.210        | -0.201        | 0.166         | -0.208       |
|             | <i>p</i> -value         | 0.153         |              | <b>0.000</b>  | 0.777         | 0.462        | 0.153         | 0.444         | 0.614     | 0.785        | 0.325         | 0.346         | 0.439         | 0.329        |
| BDE-99      | Correlation coefficient | 0.305         | <b>0.767</b> |               | 0.320         | 0.069        | 0.389         | 0.227         | 0.179     | 0.187        | -0.060        | <b>-0.411</b> | 0.203         | -0.079       |
|             | <i>p</i> -value         | 0.148         | <b>0.000</b> |               | 0.128         | 0.748        | 0.060         | 0.286         | 0.403     | 0.383        | 0.782         | <b>0.046</b>  | 0.342         | 0.713        |
| BDE-209     | Correlation coefficient | 0.201         | 0.061        | 0.320         |               | -0.080       | <b>0.463</b>  | 0.144         | -0.166    | 0.127        | -0.044        | <b>-0.564</b> | 0.013         | -0.021       |
|             | <i>p</i> -value         | 0.347         | 0.777        | 0.128         |               | 0.709        | <b>0.023</b>  | 0.502         | 0.438     | 0.553        | 0.839         | <b>0.004</b>  | 0.952         | 0.921        |
| PCBs        | Correlation coefficient | -0.045        | 0.158        | 0.069         | -0.080        |              | <b>0.400</b>  | 0.240         | 0.165     | 0.209        | -0.002        | -0.122        | -0.390        | -0.174       |
|             | <i>p</i> -value         | 0.836         | 0.462        | 0.748         | 0.709         |              | 0.053         | 0.258         | 0.441     | 0.327        | 0.994         | 0.569         | 0.060         | 0.416        |
| OH-PCBs     | Correlation coefficient | 0.356         | 0.301        | 0.389         | <b>0.463</b>  | <b>0.400</b> |               | <b>0.569</b>  | 0.029     | 0.209        | -0.386        | <b>-0.657</b> | <b>-0.460</b> | -0.013       |
|             | <i>p</i> -value         | 0.089         | 0.153        | 0.060         | <b>0.023</b>  | <b>0.053</b> |               | <b>0.004</b>  | 0.894     | 0.326        | 0.063         | <b>0.001</b>  | <b>0.024</b>  | 0.953        |
| OH-PBDEs    | Correlation coefficient | <b>0.481</b>  | 0.164        | 0.227         | 0.144         | 0.240        | <b>0.569</b>  |               | 0.324     | 0.164        | -0.108        | <b>-0.684</b> | -0.227        | 0.212        |
|             | <i>p</i> -value         | <b>0.018</b>  | 0.444        | 0.286         | 0.502         | 0.258        | <b>0.004</b>  |               | 0.122     | 0.445        | 0.615         | <b>0.000</b>  | 0.287         | 0.321        |
| MeO-PBDEs   | Correlation coefficient | 0.128         | 0.108        | 0.179         | -0.166        | 0.165        | 0.029         | 0.324         |           | 0.016        | 0.118         | -0.002        | -0.007        | 0.096        |
|             | <i>p</i> -value         | 0.550         | 0.614        | 0.403         | 0.438         | 0.441        | 0.894         | 0.122         |           | 0.940        | 0.583         | 0.994         | 0.973         | 0.656        |
| Age [year]  | Correlation coefficient | -0.263        | 0.059        | 0.187         | 0.127         | 0.209        | 0.209         | 0.164         | 0.016     |              | <b>0.543</b>  | -0.305        | 0.112         | 0.345        |
|             | <i>p</i> -value         | 0.214         | 0.785        | 0.383         | 0.553         | 0.327        | 0.326         | 0.445         | 0.940     |              | <b>0.006</b>  | 0.148         | 0.602         | 0.099        |
| Weight [kg] | Correlation coefficient | <b>-0.459</b> | -0.210       | -0.060        | -0.044        | -0.002       | -0.386        | -0.108        | 0.118     | <b>0.543</b> |               | 0.235         | <b>0.440</b>  | <b>0.431</b> |
|             | <i>p</i> -value         | <b>0.025</b>  | 0.325        | 0.782         | 0.839         | 0.994        | 0.063         | 0.615         | 0.583     | <b>0.006</b> |               | 0.268         | <b>0.032</b>  | <b>0.035</b> |
| Living      | Correlation coefficient | <b>-0.456</b> | -0.201       | <b>-0.411</b> | <b>-0.564</b> | -0.122       | <b>-0.657</b> | <b>-0.684</b> | -0.002    | -0.305       | 0.235         |               | 0.195         | -0.001       |
|             | <i>p</i> -value         | <b>0.026</b>  | 0.346        | <b>0.046</b>  | <b>0.004</b>  | 0.569        | <b>0.001</b>  | <b>0.000</b>  | 0.994     | 0.148        | 0.268         |               | 0.360         | 0.997        |
| Ratio A     | Correlation coefficient | -0.081        | 0.166        | 0.203         | 0.013         | -0.390       | <b>-0.460</b> | -0.227        | -0.007    | 0.112        | <b>0.440</b>  | 0.195         |               | 0.235        |
|             | <i>p</i> -value         | 0.707         | 0.439        | 0.342         | 0.952         | 0.060        | <b>0.024</b>  | 0.287         | 0.973     | 0.602        | <b>0.032</b>  | 0.360         |               | 0.269        |
| Ratio B     | Correlation coefficient | -0.126        | -0.208       | -0.079        | -0.021        | -0.174       | -0.013        | 0.212         | 0.096     | 0.345        | <b>0.431</b>  | -0.001        | 0.235         |              |
|             | <i>p</i> -value         | 0.557         | 0.329        | 0.713         | 0.921         | 0.416        | 0.953         | 0.321         | 0.656     | 0.099        | <b>0.035</b>  | 0.997         | 0.269         |              |

\*Ratio A was calculated by weekly feed number of times of dry food divided by total feed number of times.

\*\*Ratio B was calculated by weekly feed number of times of wet food divided by total feed number of times.

**Table S10.** Estimation of daily intake (DI) and hazard quotient (HQ) of BDE-47 via cat food and house dust.

| Source                              |        | Concentration (pg/g) | Intake of pet food (g) | Intake of house dust (mg) | DI (ng/kg/day) |
|-------------------------------------|--------|----------------------|------------------------|---------------------------|----------------|
| <b>Dry food</b>                     | median | 4.9                  | 78 <sup>b</sup>        | -                         | 0.1            |
|                                     | worst  | 15                   | 120 <sup>c</sup>       | -                         | 0.5            |
| <b>Dry and Wet food<sup>a</sup></b> | median | -                    | 230 <sup>b</sup>       | -                         | 0.3            |
|                                     | worst  | -                    | 270 <sup>c</sup>       | -                         | 2.6            |
| <b>Wet food</b>                     | median | 5.6                  | 380 <sup>b</sup>       | -                         | 0.5            |
|                                     | worst  | 46                   | 420 <sup>c</sup>       | -                         | 4.8            |
| <b>House dust</b>                   | median | 260                  | -                      | 50 <sup>d</sup>           | 0.0033         |
|                                     | worst  | 890                  | -                      | 200 <sup>e</sup>          | 0.045          |

<sup>a</sup> Half of dry food and wet food

<sup>b</sup> Average of recommended feed amount for 4 kg cat written in package labels.

<sup>c</sup> Maximum of recommended feed amount for 4 kg cat written in package labels.

<sup>d</sup> Extrapolated the standard value of house dust intake to infants (Dirtu et al., 2010)

<sup>e</sup> Extrapolated the maximum of house dust intake to infants (Dirtu et al., 2010)

**Table. S11.** Estimation of daily intake (DI) of BDE-99 via cat food and house dust.

| Source                              |        | Concentration (pg/g) | Intake of pet food (g) | Intake of house dust (mg) | DI (ng/kg/day) |
|-------------------------------------|--------|----------------------|------------------------|---------------------------|----------------|
| <b>Dry food</b>                     | median | <MDL                 | 78 <sup>b</sup>        | -                         | 0.0            |
|                                     | worst  | 12                   | 120 <sup>c</sup>       | -                         | 0.4            |
| <b>Dry and Wet food<sup>a</sup></b> | median | -                    | 230 <sup>b</sup>       | -                         | 0.0            |
|                                     | worst  | -                    | 270 <sup>c</sup>       | -                         | 0.8            |
| <b>Wet food</b>                     | median | <MDL                 | 380 <sup>b</sup>       | -                         | 0.0            |
|                                     | worst  | 11                   | 420 <sup>c</sup>       | -                         | 1.2            |
| <b>House dust</b>                   | median | 210                  | -                      | 50 <sup>d</sup>           | 0.0026         |
|                                     | worst  | 1400                 | -                      | 200 <sup>e</sup>          | 0.070          |

<sup>a</sup> Half of dry food and wet food

<sup>b</sup> Average of recommended feed amount for 4 kg cat written in package labels.

<sup>c</sup> Maximum of recommended feed amount for 4 kg cat written in package labels.

<sup>d</sup> Extrapolated the standard value of house dust intake to infants (Dirtu et al., 2010)

<sup>e</sup> Extrapolated the maximum of house dust intake to infants (Dirtu et al., 2010)

**Table S12.** Estimation of daily intake (DI) of BDE-153 via cat food and house dust.

| Source                              |        | Concentration (pg/g) | Intake of pet food (g) | Intake of house dust (mg) | DI (ng/kg/day) |
|-------------------------------------|--------|----------------------|------------------------|---------------------------|----------------|
| <b>Dry food</b>                     | median | <MDL                 | 78 <sup>b</sup>        | -                         | 0.0            |
|                                     | worst  | <MDL                 | 120 <sup>c</sup>       | -                         | 0.0            |
| <b>Dry and Wet food<sup>a</sup></b> | median | -                    | 230 <sup>b</sup>       | -                         | 0.0            |
|                                     | worst  | -                    | 270 <sup>c</sup>       | -                         | 0.0            |
| <b>Wet food</b>                     | median | <MDL                 | 380 <sup>b</sup>       | -                         | 0.0            |
|                                     | worst  | <MDL                 | 420 <sup>c</sup>       | -                         | 0.0            |
| <b>House dust</b>                   | median | <MDL                 | -                      | 50 <sup>d</sup>           | 0.0            |
|                                     | worst  | 430                  | -                      | 200 <sup>e</sup>          | 0.022          |

<sup>a</sup> Half of dry food and wet food

<sup>b</sup> Average of recommended feed amount for 4 kg cat written in package labels.

<sup>c</sup> Maximum of recommended feed amount for 4 kg cat written in package labels.

<sup>d</sup> Extrapolated the standard value of house dust intake to infants (Dirtu et al., 2010)

<sup>e</sup> Extrapolated the maximum of house dust intake to infants (Dirtu et al., 2010)



**Table S13.** Estimation of daily intake (DI) of BDE-209 via cat food and house dust.

| Source                              |        | Concentration (pg/g) | Intake of cat food (g) | Intake of house dust (mg) | DI (ng/kg/day) |
|-------------------------------------|--------|----------------------|------------------------|---------------------------|----------------|
| <b>Dry food</b>                     | median | 330                  | 78 <sup>b</sup>        | -                         | 6.4            |
|                                     | worst  | 31000                | 120 <sup>c</sup>       | -                         | 930            |
| <b>Dry and Wet food<sup>a</sup></b> | median | -                    | 230 <sup>b</sup>       | -                         | 3.8            |
|                                     | worst  | -                    | 270 <sup>c</sup>       | -                         | 475            |
| <b>Wet food</b>                     | median | 12                   | 380 <sup>b</sup>       | -                         | 1.1            |
|                                     | worst  | 190                  | 420 <sup>c</sup>       | -                         | 20             |
| <b>House dust</b>                   | median | 200000               | -                      | 50 <sup>d</sup>           | 2.5            |
|                                     | worst  | 520000               | -                      | 200 <sup>e</sup>          | 26             |

<sup>a</sup> Half of dry food and wet food

<sup>b</sup> Average of recommended feed amount for 4 kg cat written in package labels.

<sup>c</sup> Maximum of recommended feed amount for 4 kg cat written in package labels.

<sup>d</sup> Extrapolated the standard value of house dust intake to infants (Dirtu et al., 2010)

<sup>e</sup> Extrapolated the maximum of house dust intake to infants (Dirtu et al., 2010)
